# Supplementary material for: Advancing energy storage through solubility prediction: leveraging the potential of deep learning
Source: Royal Society of Chemistry journal article supplement (doi:10.1039/d3cp03992g), 2023-01-01
Supplement: d3cp03992g1.pdf [file d3cp03992g1.pdf]

# Advancing Energy Storage through Solubility Prediction: Leveraging the Potential of Deep Learning

Mesfin Diro Chaka <sup>a,c,\*</sup>, Yedilfana Setarge Mekonnen <sup>b</sup>, Qin Wu <sup>d</sup>, Chernet Amente Geffe <sup>a</sup>

<sup>a</sup>Department of Physics, College of Natural and Computational Sciences, Addis Ababa University, P. O. Box 1176, Addis Ababa, Ethiopia,

<sup>b</sup>Center for Environmental Science, College of Natural and Computational Sciences, Addis Ababa University, P. O. Box 1176, Addis Ababa, Ethiopia,

<sup>c</sup>Computational Data Science Program, College of Natural and Computational Sciences, Addis Ababa University, P. O. Box 1176, Addis Ababa, Ethiopia,

<sup>d</sup>Center for Functional Nanomaterials, Brookhaven National Laboratory, Upton, NY 11973, USA,

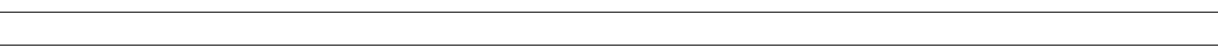

---

\*Corresponding author

Email address: mesfin.diro@aaau.edu.et (Mesfin Diro Chaka )

## 1. AqSolDB Dataset

4

Table S 1: Randomly sampled smiles strings with their corresponding LogS in AqSolDB dataset

| smiles                                                         | Experimental<br>LogS(Mol/L) |
|----------------------------------------------------------------|-----------------------------|
| <chem>O=C([O-])CO.[NH4+]</chem>                                | 1.701                       |
| <chem>OCCCCCO</chem>                                           | 1.626                       |
| <chem>CC(N)=O</chem>                                           | 1.581                       |
| <chem>CNC</chem>                                               | 1.558                       |
| <chem>CN</chem>                                                | 1.369                       |
| <chem>C1CN1</chem>                                             | 1.366                       |
| <chem>CC=O</chem>                                              | 1.356                       |
| <chem>NC=O</chem>                                              | 1.346                       |
| <chem>CNN</chem>                                               | 1.337                       |
| <chem>c1cn[nH]c1</chem>                                        | 1.288                       |
| <chem>C#CCO</chem>                                             | 1.251                       |
| <chem>CC1CN1</chem>                                            | 1.243                       |
| <chem>C=CCN</chem>                                             | 1.243                       |
| <chem>NC1CC1</chem>                                            | 1.243                       |
| <chem>O=CC=O</chem>                                            | 1.236                       |
| <chem>C1COC1</chem>                                            | 1.236                       |
| <chem>CCO</chem>                                               | 1.234                       |
| <chem>CNC=O</chem>                                             | 1.229                       |
| <chem>CC(C)N</chem>                                            | 1.228                       |
| <chem>CCCN</chem>                                              | 1.228                       |
| <chem>NCCN</chem>                                              | 1.221                       |
| <chem>CN(C)N</chem>                                            | 1.221                       |
| <chem>NCCO</chem>                                              | 1.214                       |
| <chem>OCCO</chem>                                              | 1.207                       |
| <chem>OCCF</chem>                                              | 1.193                       |
| <chem>CN(C)C</chem>                                            | 1.178                       |
| <chem>O=CO</chem>                                              | 1.176                       |
| <chem>Clc1cc(Cl)c(Cl)c(-c2c(Cl)c(Cl)c(Cl)c(Cl)c2Cl)c1Cl</chem> | -10.412                     |
| <chem>Clc1cc(Oc2cc(Cl)c(Cl)c(Cl)c2Cl)c(Cl)c(Cl)c1Cl</chem>     | -10.100                     |
| <chem>Clc1cc(Oc2c(Cl)c(Cl)cc(Cl)c2Cl)c(Cl)c(Cl)c1Cl</chem>     | -10.100                     |
| <chem>Clc1cc(Cl)c(Oc2c(Cl)c(Cl)c(Cl)c2Cl)cc1Cl</chem>          | -10.100                     |
| <chem>Clc1cc(-c2c(Cl)c(Cl)c(Cl)c2Cl)cc(Cl)c1Cl</chem>          | -9.700                      |
| <chem>Clc1ccc(Oc2c(Cl)c(Cl)c(Cl)c2Cl)c(Cl)c1</chem>            | -9.640                      |
| <chem>Clc1cc(Oc2cc(Cl)c(Cl)c(Cl)c2Cl)cc(Cl)c1Cl</chem>         | -9.540                      |
| <chem>Clc1cc(Cl)c(-c2c(Cl)c(Cl)c(Cl)c2Cl)cc1Cl</chem>          | -9.500                      |

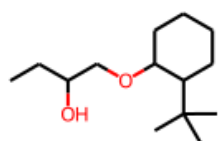

-3.6987

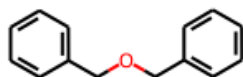

-3.695

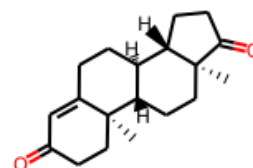

-3.6949

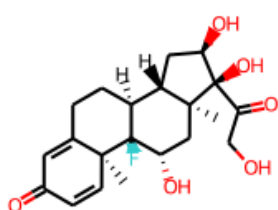

-3.6929

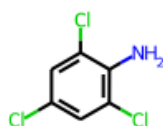

-3.6912

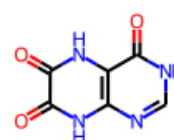

-3.69

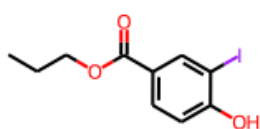

-3.6865

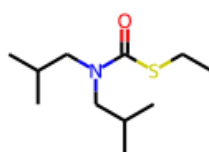

-3.684

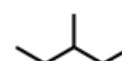

-3.6826

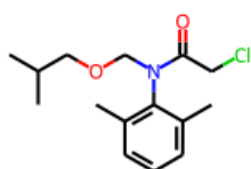

-3.6822

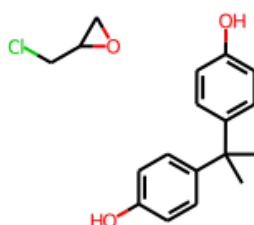

-3.6804

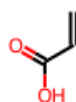

-3.68

Figure S 1: Some of randomly sampled molecules in AqSolDB dataset

## 2. Explanatory Analysis

5

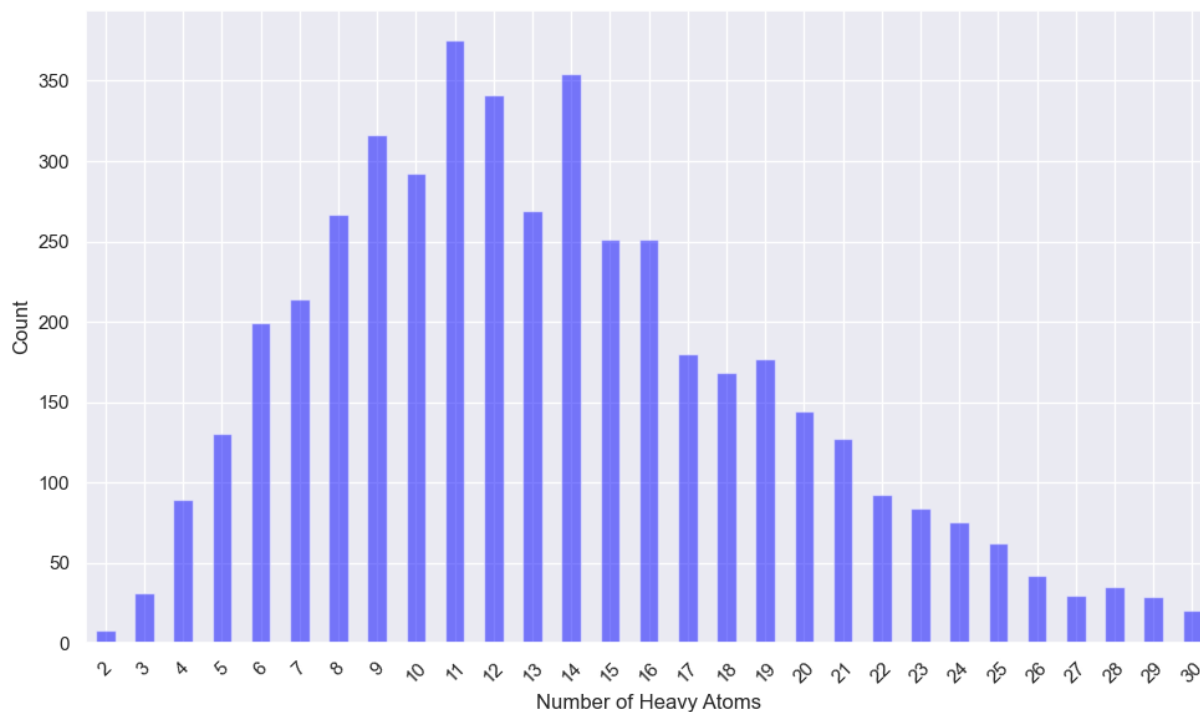

Figure S 2: The total number of heavy atoms in AqSolDB dataset used for the training

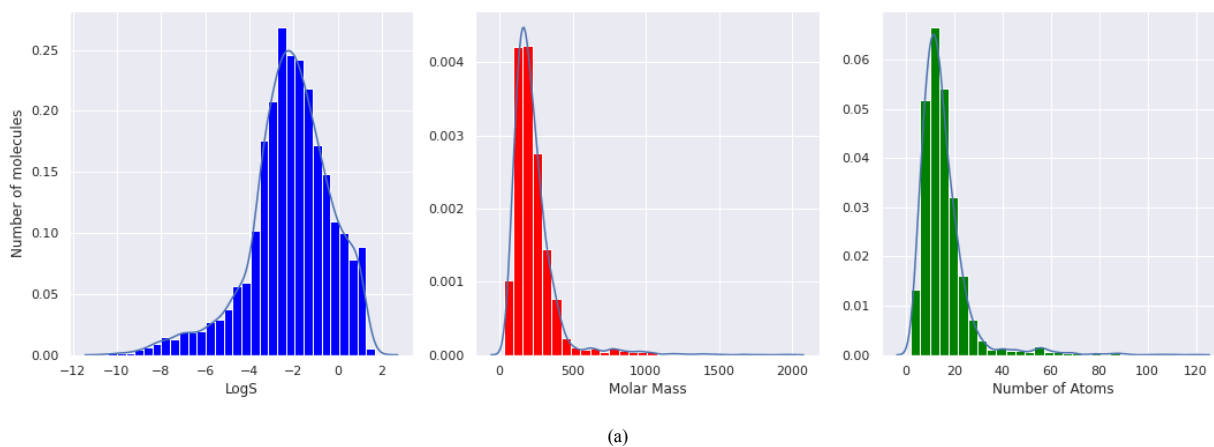

Figure S 3: Histogram of LogS, Molar mass and Number of atoms in AqSolDB dataset

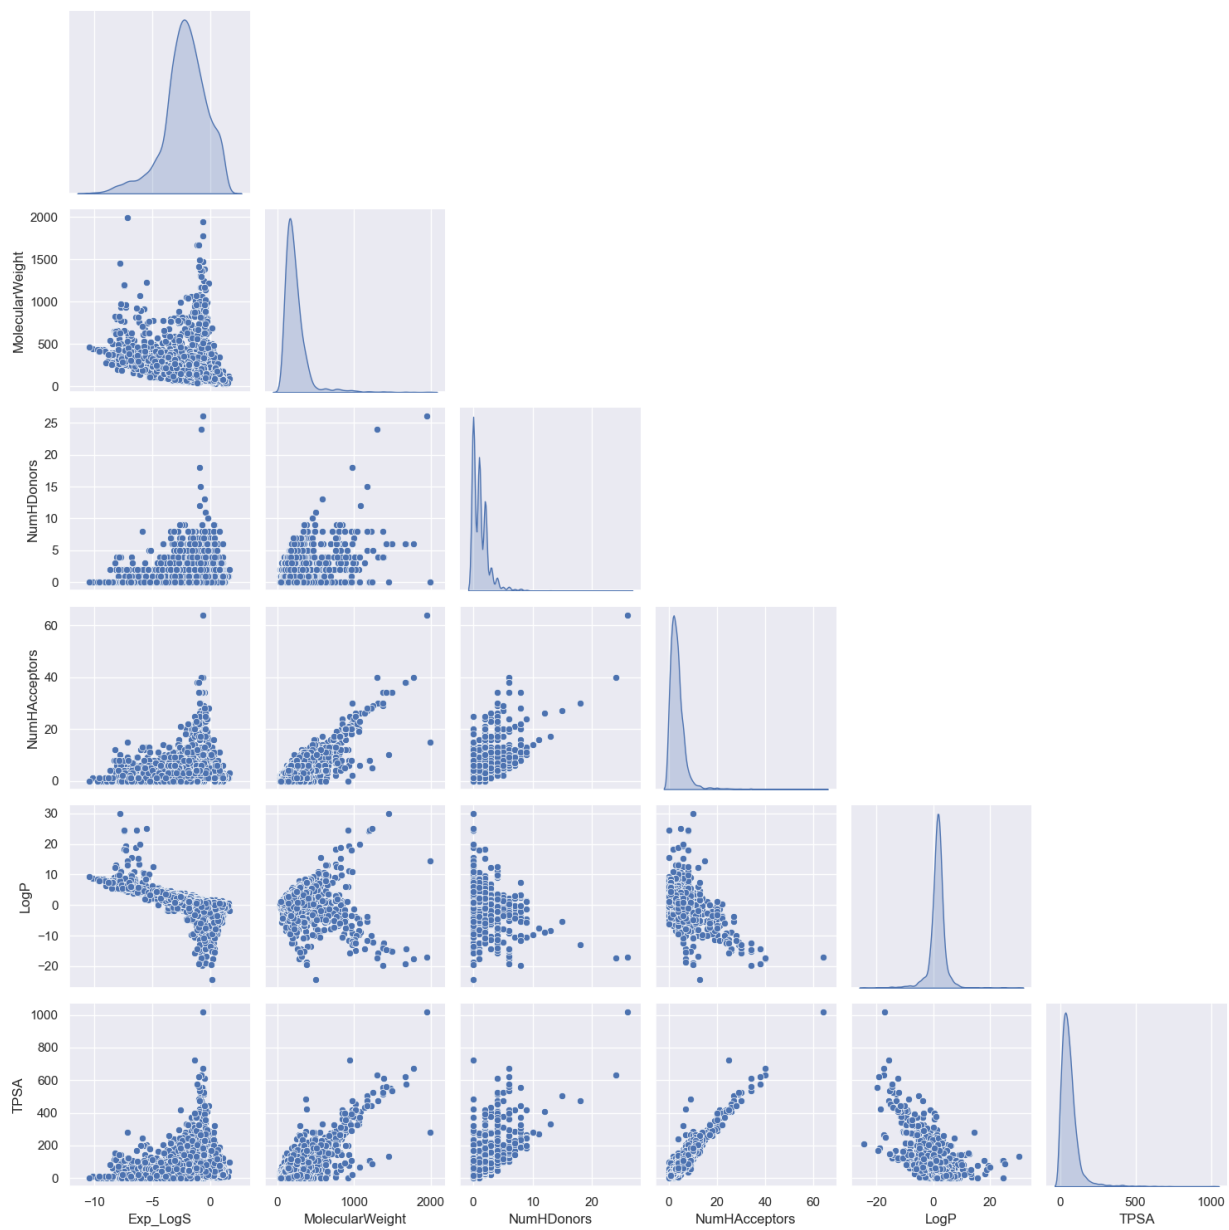

Figure S 4: Pair Plot of Selected Descriptors and Experimental LogS

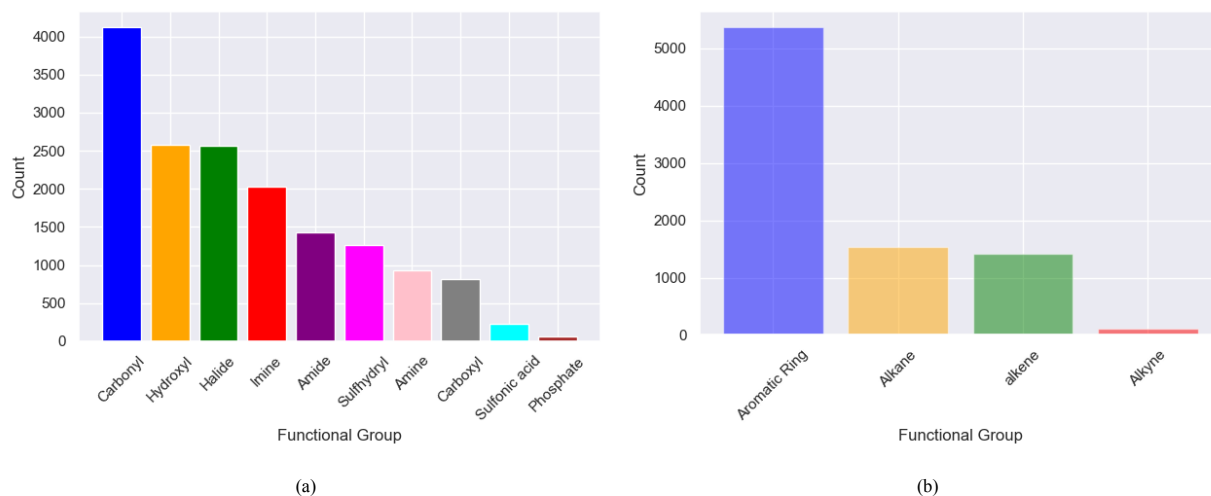

Figure S 5: The distribution of dominant functional groups in AqSolDB dataset a) polar functional groups b) non-polar functional groups

### 2.1. Pytorch\_geometric(Pyg) graph representation of AqSolDB from the SMILE Strings

6

```
import os.path as osp
from custom_pygdata import AqSolDB
path = osp.join(osp.dirname(osp.realpath('__file__')), 'data', 'aqsolddb')
mol_sol = AqSolDB(root_dir=path,
                  name='AqSolDB2.csv',
                  smi_idx=-4,
                  target_idx=-3).shuffle()
```

7

Data(x=[290455, 30], edge\_index=[2, 590090], edge\_attr=[590090, 12], y=[8494, 1], smiles=[8494])

### 2.2. Target variable normalized to mean = 0 and std = 1

9

```
r_mean = mol_sol.data.y.mean()
r_std = mol_sol.data.y.std()
mol_sol.data.y = (mol_sol.data.y - r_mean) / r_std
print("Normalized LogS:\n",mol_sol.data.y)
```

10

```
Normalized LogS:
tensor([[ 0.8059],
        [-0.0870],
        [ 0.0549],
        ...,
        [-1.8041],
        [-0.1992],
        [-1.3752]])
```

11

12

13

14

15

16

17

18

---

### 2.3. Sample atomic attributes

19

Sample atomic features in Pyg graph format:

20

```
tensor([[0.0549, 0.0000, 0.0000, ..., 0.0464, 0.3704, 0.2632],
        [0.0549, 0.0000, 0.0000, ..., 0.0464, 0.3704, 0.2632],
        [0.0549, 0.0000, 0.0000, ..., 0.0464, 0.3704, 0.2632],
        ...,
        [0.0000, 0.0000, 1.0000, ..., 0.0000, 0.0000, 0.0000],
        [0.0000, 0.0000, 1.0000, ..., 0.0000, 0.0000, 0.0000],
        [0.0000, 0.0000, 1.0000, ..., 0.0000, 0.0000, 0.0000]])
```

21

22

23

24

25

26

27

### 2.4. Sample edge attributes

28

Sample edge features in Pyg graph format:

29

```
tensor([[0., 0., 0., ..., 0., 0., 0.],
        [0., 0., 0., ..., 0., 0., 0.],
        [1., 0., 0., ..., 0., 0., 0.],
        ...,
        [1., 0., 0., ..., 0., 0., 0.],
        [1., 0., 0., ..., 0., 0., 0.],
        [1., 0., 0., ..., 0., 0., 0.]])
```

30

31

32

33

34

35

36

## 3. MolGAT Model Implementation

37

MolGAT(

38

  (conv\_list): ModuleList(

39

    (0): MolGATConv(30, 192, 12, heads=4)

40

    (1-2): 2 x MolGATConv(192, 192, 12, heads=4)

41

  )

42

  (fc\_list): ModuleList(

43

    (0): Linear(in\_features=384, out\_features=384, bias=True)

44

    (1): Linear(in\_features=384, out\_features=192, bias=True)

45

    (2): Linear(in\_features=192, out\_features=192, bias=True)

46

  )

47

  (fc\_out): Linear(in\_features=192, out\_features=1, bias=True)

48

)

49

Number of parameters: 699793

50

#### 4. Training MolGAT Model

51

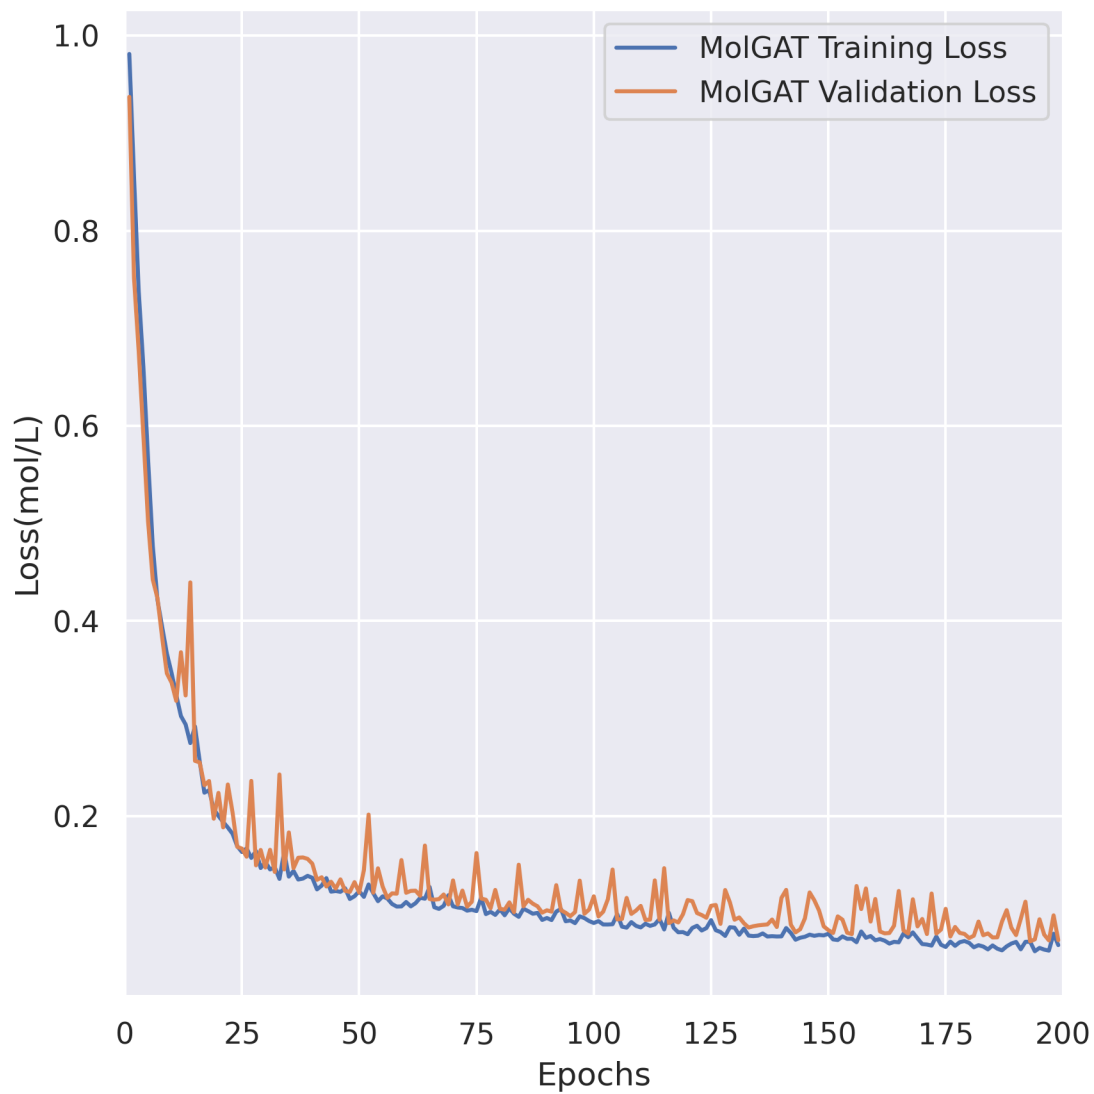

(a)

Figure S 6: Error loss plot during MolGAT model training on AqSolDB



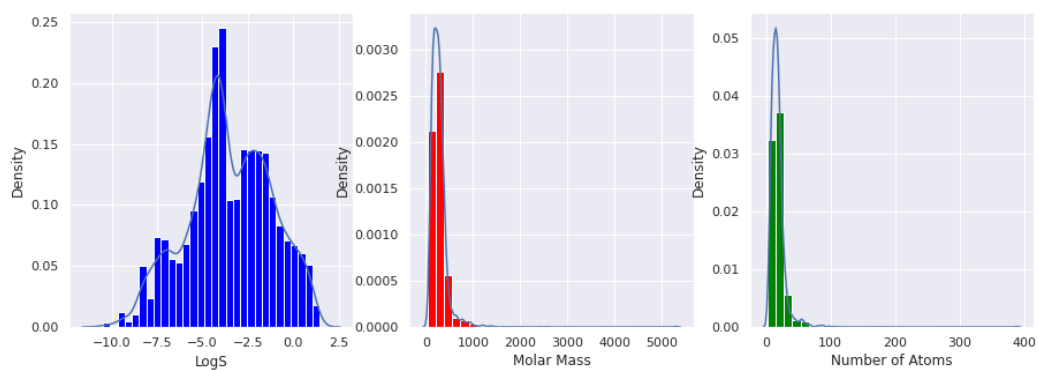

Figure S 7: Distributions of log solubility, molar mass (g/mol), and number of atoms for molecules in screened data set with MolGAT.

#### 4.1. Benchmarking

52

##### 4.1.1. Random Forest(RF) model training

53

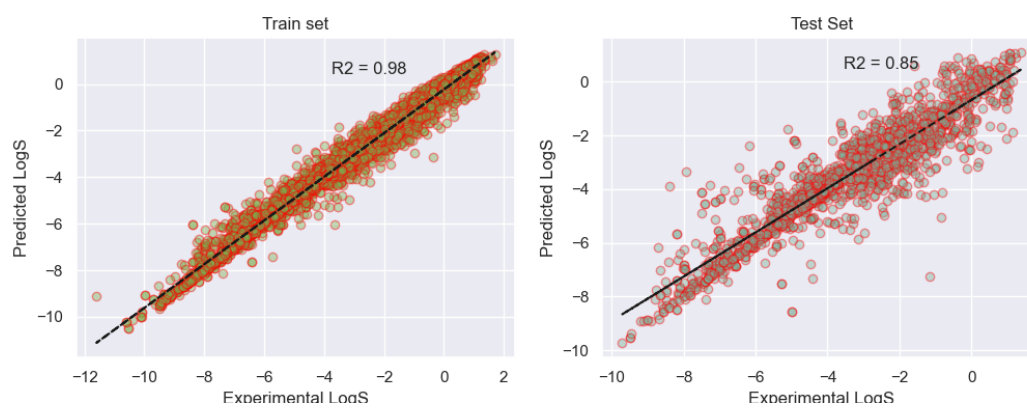

Figure S 8: Parity plot for Random Forest model with AqSolDB.

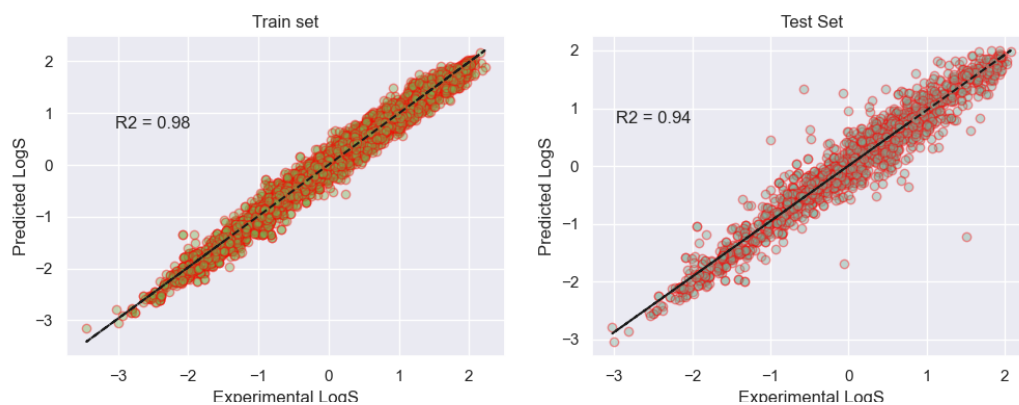

Figure S 9: Parity plot for MPNN model with AqSolDB.

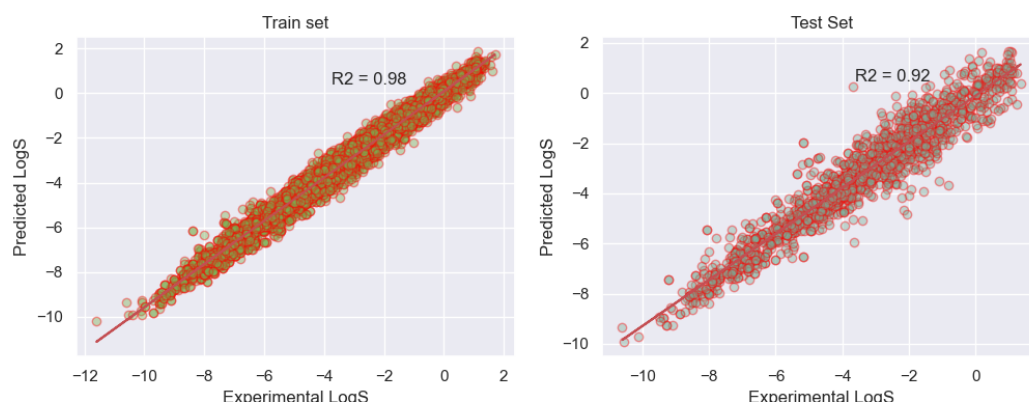

Figure S 10: Parity plot for GCM model with AqSolDB.

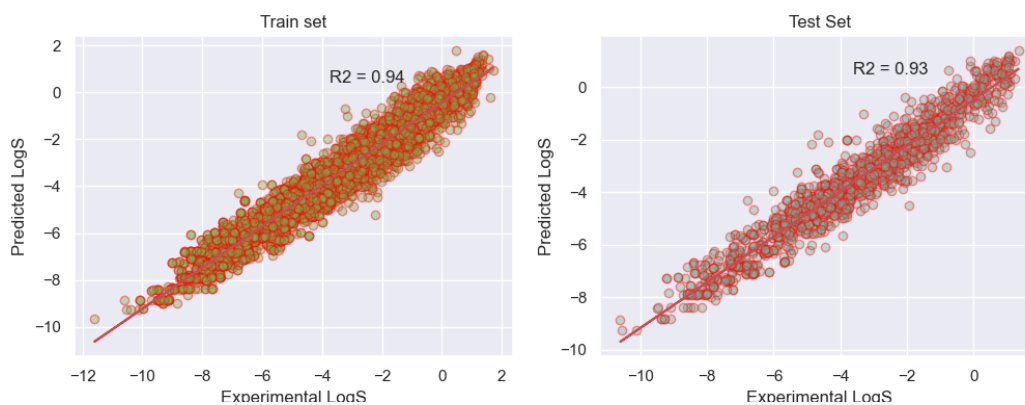

Figure S 11: Parity plot for AttentiveFP model with AqSolDB.

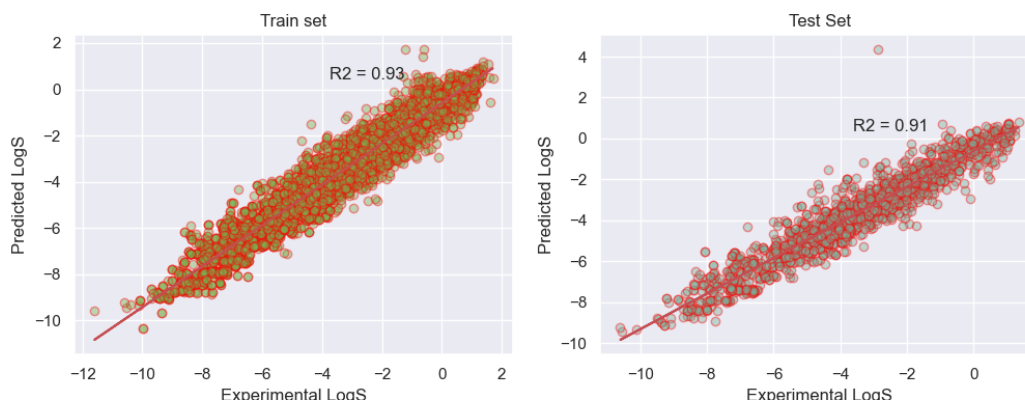

Figure S 12: Parity plot for GAT model with AqSolDB.

## 5. Screened Dataset

### 5.1. Sample molecules from screened dataset

Table S 2: Sample smiles, reaction energy and logS from a total screened dataset using the trained molgat model

| SMILES                                                                                          | Reaction energy(eV) | Predicted LogS(Mol/L) |
|-------------------------------------------------------------------------------------------------|---------------------|-----------------------|
| <chem>C1 = CC(= O)C(= CN = C2C = CC3 = NC(= NC3 = C2)C4 = C(C = C(C = C4)C)C)C = C1N(O)O</chem> | -2.35057            | -3.63134              |
| <chem>CONC1 = C2C = C(C = CC2 = NC1 = O)[N+](= O)[O-]</chem>                                    | -2.31088            | -2.31388              |
| <chem>COC1 = CC(= CN = C2C = CC3 = NC(= NC3 = C2)C4 = CC = CC(= C4)C(= O)C(= C1)N(O)O</chem>    | -2.30341            | -2.66933              |
| <chem>C1 = CC = C(C = C1)C2 = NC3 = CC(= NC = C4C = C(C = CC4 = O)N(O)O)C = CC3 = N2</chem>     | -2.28478            | -2.75551              |

| SMILES                                                                                                | Reaction energy(eV) | Predicted LogS(Mol/L) |
|-------------------------------------------------------------------------------------------------------|---------------------|-----------------------|
| <chem>C1 = CC = C(C = C1)C2 = NC(= C3C = CC(= O)C(= C3)N(O)O)N = C2C4 = CC = CC = C4</chem>           | -2.20292            | -3.32659              |
| <chem>C1 = CC2 = C(C(= C1)[N+](= O)[O-])C(= O)N = C2[O-]</chem>                                       | -2.08322            | -2.38020              |
| <chem>C1 = CC2 = NC(= C3C = C(C = CC3 = O)N = CC4 = C(C(= CC = C4)N(O)O)O)N = C2C = C1</chem>         | -2.06541            | -3.33318              |
| <chem>CC1 = CC(= CN = C2C = CC(= C3N = C4C = CC = CC4 = N3)C = C2)C(= O)C(= C1)N(O)O</chem>           | -2.01272            | -2.42499              |
| <chem>C1 = CC2 = C3C(= CC(= N)C(= O)N3C4 = CC = C(C = C4)N(O)O)N = C2C = C1</chem>                    | -1.94489            | -3.32238              |
| <chem>C1 = CC2 = C3C(= C1)NC(= NC3 = CC = C2)C(= O)O</chem>                                           | -1.78178            | -3.04786              |
| <chem>C1 = CC = C2C(= C1)C(= CC3 = C(N(C(= S)S3)CC(= O)[O-])O)C = N2</chem>                           | -1.76830            | -3.55150              |
| <chem>CC(= O)N = C1C = CC2 = NC(= NC(= S)NC(= O)C3 = CC = C(O3)C4 = CC = CC = C4N(O)O)SC2 = C1</chem> | -1.75821            | -3.09294              |
| <chem>CC1 = CC = CC2 = C(C(= O)N = C12)C3 = C(N(C(= S)S3)CC(= O)O)O</chem>                            | -1.71661            | -3.48864              |
| <chem>C1 = COC(= C1)C2 = NN3C(= N)C(= CC4 = CC = C(O4)[N+](= O)[O-])C(= O)N = C3S2</chem>             | -1.71067            | -3.51928              |
| <chem>C1 = CC = C2C(= C1)C(= CC3 = C(N(C(= S)S3)C(CCC(= O)[O-])C(= O)[O-])O)C = N2</chem>             | -1.70025            | -3.29246              |
| <chem>CCCN[C@H](e1enccc1C)C(C)(C)[NH+](C)C</chem>                                                     | 2.29304             | -1.58715              |
| <chem>CCCC[NH2+][CO]e1cccnc1C</chem>                                                                  | 2.29404             | -1.31283              |
| <chem>COe1ccsc1CN[C@H]1CC[C@H]([NH+](C)C)C1</chem>                                                    | 2.29995             | -1.29218              |
| <chem>Ce1enccc1CC[NH2+][C@@H](C(C)C)C1CC1</chem>                                                      | 2.30251             | -3.13770              |
| <chem>CC[NH+](CC)CC[C@H](N)e1enccc1C</chem>                                                           | 2.31325             | -0.421087             |
| <chem>CC[NH2+][C@@H](Oe1cccnc1C)C(C)C</chem>                                                          | 2.31491             | -1.53976              |
| <chem>COe1ccsc1C[NH+](C)[C@H](C)C1(C)CC1</chem>                                                       | 2.32320             | -3.54068              |
| <chem>Ce1nccc1O[C@H](C)C[NH2+][CC(C)C</chem>                                                          | 2.33822             | -1.31810              |
| <chem>CCC(C)(C)[NH2+][CO]e1cccnc1C</chem>                                                             | 2.36882             | -1.49300              |
| <chem>CN[C@@H](e1enccc1C)[C@]1([NH+](C)C)CCC[C@H](C)C1</chem>                                         | 2.79311             | -2.82409              |
| <chem>CC(C)(C)[NH2+][C]e1ccc(OCC[NH+][2CCCCC2])en1</chem>                                             | 2.79488             | -1.70223              |
| <chem>CCC(CO)(CCO)CNe1enccc(Br)c1</chem>                                                              | 2.81312             | -3.69122              |
| <chem>CC[C@H](C)COe1ccc[C@H]([NH3+])CC)nc1</chem>                                                     | 2.83353             | -1.78672              |
| <chem>Ce1ccc(O[C@H](C)[C@@H](C)O)c[C@H]([NH2+])CC(C)Cn1</chem>                                        | 2.85439             | -1.72013              |
| <chem>CC[C@@H](C)CN(CC)c1nc2c(s1)[C@H]([NH2+])CC(C)(C)C2</chem>                                       | 2.87374             | -2.58608              |
